# Supplementary material for: Feasibility of simultaneous photoselective vaporization of the prostate and MRI/TRUS fusion guided biopsy in patients with suspected prostate cancer
Source: Research Square preprint supplement (doi:10.21203/rs.3.rs-4113443/v1), 2024-03-21
Supplement: Supplementary file 1 [file 5fd012501518ba97897eb5f2.xlsx]

## Sheet: Sheet1
Clinical data of prostate cancer patients		n=43	Percentage(%)
Age	61-70	11	0.255814
	71-80	17	0.395349
	81-90	14	0.325581
	＞90	1	0.0232558
Preoperative PSA( ng /ml)	0-4	3	0.0697674
	4.001-10	6	0.139535
	10.001-20	14	0.325581
	20.001-50	13	0.302326
	50.001-100	6	0.139535
	100.001-200	1	0.0232558
DRE	Positive	35	0.770833
	Negative	8	0.229167
Gleason score	6	11	0.255814
	3+4	9	0.209302
	4+3	6	0.139535
	4+4, 5+3, 3+5	5	0.116279
	5+4, 4+5, 5+5	12	0.27907
TNM-staging	T1aN0M0	6	0.139535
	T2aN0M0	9	0.209302
	T2bN0M0	5	0.116279
	T2bN1M0	1	0.0232558
	T2bN0M1b	1	0.0232558
	T3aN0M0	2	0.0465116
	T3aN0M1b	1	0.0232558
	T3aN1M1b	3	0.0697674
	T3bN0M0	4	0.0930233
	T3bN0M1b	6	0.139535
	T3bN0M1c	2	0.0465116
	T3bN1M1b	3	0.0697674
Subsequent therapy	WW	5	0.116279
	AS	4	0.0930233
	only ADT	16	0.372093
	NHT+ADT	1	0.0232558
	ADT+RT	4	0.0930233
	NHT+ADT+RT	13	0.302326
