# Supplementary material for: Feasibility of simultaneous photoselective vaporization of the prostate and MRI/TRUS fusion guided biopsy in patients with suspected prostate cancer
Source: Research Square preprint supplement (doi:10.21203/rs.3.rs-4113443/v1), 2024-03-21
Supplement: Supplementary file 2 [file 7e524aeadaa9f4bb69edbe95.xlsx]

## Sheet: Sheet1
	Preoperative	3 months after surgery	6 months after surgery	12 months after surgery
TPSA (ng/mL)	0.51-156.00 (26.6995±28.05311)	0.046-8.990（2.024±2.498）	0.004-8.470（1.247±2.210）	0.001-8.550（1.061±2.388）
IPSS	26-35（32.021±2.862）	2-22（8.884±4.288）	2-12 (5.791±1.726)	2-9 (5.280±1.608)
QOL	4-6（5.250±0.601）	1-5 (2.72±1.008)	1-4（2.930±0.961）	2-4（2.744±0.848）
Qmax (mL/s)	0-10.0（4.542±2.379）	8-20(15.581±3.304）	12-20 （16.116±2.602）	12-20 (16.302±2.704）
PVR(mL)	90-1200 （379.958±241.003）	20-69 (46.884±16.21)	20-59 (38.884±12.038）	20-40 (0.326±6.035)
